# Supplementary material for: On the nature of the boron–copper interaction. Topological study of the electron localisation function (ELF)
Source: Royal Society of Chemistry journal article supplement (doi:10.1039/c8nj03516d), 2018-01-01
Supplement: c8nj03516d1.pdf [file c8nj03516d1.pdf]

## Supplementary material S1.

### Chemical names of of 18 organoboron compounds taken from CSD.

1. *cichut* - ( $\mu^3$ -boranylidene)-bis( $\mu^2$ -carbonyl)-bis( $\eta^5$ -cyclopentadienyl)-dicarbonyl-(1,3-bis(4-methylphenyl)-1,3-dihydro-2H-imidazol-2-ylidene)-copper-di-manganese
2. *buzlep* - ( $\mu$ -boranylidene)-bis( $\mu$ -carbonyl)-bis( $\eta^5$ -cyclopentadienyl)-dicarbonyl-tricyclohexylphosphine-copper-di-manganese
3. *logdan* - ( $\mu^2$ -bromo)-(1,3-bis(2,6-diisopropylphenyl)-1,3,2-diazaborolidin-2-yl)-tris(tetrahydrofuran-O)-copper-lithium
4. *cedhup* - (1,3-bis(2,6-diisopropylphenyl)imidazol-2-ylidene)-(pinacolatoboryl)-copper(i)
5. *ekukax* - ( $\mu^2$ -cyanido)-(1,3-bis(2,6-diisopropylphenyl)-1,3-dihydro-2H-1,3,2-diazaborol-2-yl)-tris(tetrahydrofuran)-copper-lithium
6. *codguz* - (1,3-bis(2,6-diisopropylphenyl)imidazol-2-ylidene)-(1,3-dibenzyl-1,3-dihydro-2H-1,3,2-benzodiazaborol-2-yl)-copper
7. *codhag* - (1,3-bis(2,6-diisopropylphenyl)imidazol-2-ylidene)-(1,3-dimethyl-1,3-dihydro-2H-1,3,2-benzodiazaborol-2-yl)-copper
8. *ciljaj* - (1,3-bis(2,6-di-isopropylphenyl)-2-boraimidazol-2-yl)-(1,3-(2,4,6-trimethylphenyl)imidazole-2-ylidene)-copper
9. *ciljen* - (1,3-bis(2,6-di-isopropylphenyl)-2-boraimidazolidin-2-yl)-(1,3-(2,4,6-trimethylphenyl)imidazole-2-ylidene)-copper
10. *logdiv* - bis( $\mu^2$ -1,3-bis(2,6-diisopropylphenyl)-1,3,2-diazaborolidin-2-yl)-bis( $\mu^2$ -bromo)-tetra-copper(i)
11. *sogmac* - 3-Triphenylphosphine-4-dimethylsulfido-3-cupra-1,2-dicarba-closo-dodecaborane(10)
12. *hbtpcu* - octahydrotriborato-bis(triphenylphosphine)-copper(i)
13. *hokhaq* - ( $\mu^2$ -Hexahydro-closo-hexaborato)-bis(bis(triphenylphosphine)-copper(i))
14. *mezgul* - (boranetriyltri-2,1-phenylene)tris(diisopropylphosphine)-copper tetrakis(3,5-bis(trifluoromethyl)phenyl)borate
15. *qosweb* - (tris(2-(diisopropylphosphino)phenyl)borane)-chloro-copper
16. *gajgub* - chloro-(bis(2-diisopropylphosphinophenyl)phenylborane)-copper
17. *gajgop* - chloro-(bis(2-diphenylphosphinophenyl)phenylborane)-copper
18. *gajgef* - bis( $\mu^2$ -chloro)-bis( $\eta^2$ -(2-(diisopropylphosphino)phenyl)diphenylborane)-di-copper
